# Supplementary material
Source: PubMed Central journal article supplement (PMC6170874)
Supplement: 13770_2016_94_MOESM1_ESM.pdf [file 13770_2016_94_MOESM1_ESM.pdf]

**Supplementary Table 1.** List of primers for real-time PCR

| Gene         | Sequence                                                                                  |
|--------------|-------------------------------------------------------------------------------------------|
| <i>OCT4</i>  | F 5'-CTT GCT GCA GAA GTG GGT GGA GGA A3'<br>R 5'-CTG CAG TGT GGG TTT CGG GCA-3'           |
| <i>NANOG</i> | F 5'-AGT CCC AAA GGC AAA CAA CCC ACT TC-3'<br>R 5'-TGC TGG AGG CTG AGG TAT TTC TGT CTC-3' |
| <i>SOX2</i>  | F 5'-CAA TGC GGG GAG GAG AAG TC-3'<br>R 5'-CTC TGG ACC AAA CTG TGG CG-3'                  |
| <i>SOX17</i> | F 5'-ACT GCA ACT ATC CTG ACG TG-3'<br>R 5'-AGG AAA TGG AGG AAG CTG TT-3'                  |
| <i>FOXA2</i> | F 5'-GCA GAT ACC TCC TAC TAC CA-3'<br>R 5'-GAA GCA GGA GTC TAC ACA GT-3'                  |
| <i>CXCR4</i> | F 5'-CTT CTA CCC CAA TGA CTT GTG G-3'<br>R 5'-AAT GTA GTA AGG CAG CCA ACA G-3'            |
| <i>GATA4</i> | F 5'-CTA CAG GGG CAC TTA ACC CA-3'<br>R 5'-AGA GCT GAA TCG CTC AGA GC-3'                  |
| <i>GATA6</i> | F 5'-CCT CAC TCC ACT CGT GTC TGC-3'<br>R 5'-GTC CTG GCT TCT GGA AGT GG-3'                 |

PCR: polymerase chain reaction
