# Supplementary material
Source: PubMed Central journal article supplement (PMC6170874)
Supplement: 13770_2016_94_MOESM2_ESM.pdf [file 13770_2016_94_MOESM2_ESM.pdf]

**Supplementary Table 2.** List of antibodies for immunostaining

| Antibody | Number  | Company                  | Dilution |
|----------|---------|--------------------------|----------|
| OCT4     | SC5279  | Santa cruz biotechnology | 1:500    |
| NANOG    | AF1997  | R&D systems              | 1:100    |
| SOX17    | AF1924  | R&D systems              | 1:100    |
| FOXA2    | AF2400  | R&D systems              | 1:100    |
| Albumin  | CL2513A | CEDARLANE                | 1:200    |
| AFP      | A0008   | DAKO                     | 1:500    |
| ASGPR-1  | Ab49355 | Abcam                    | 1:100    |
| CK19     | EP1580Y | Abcam                    | 1:200    |
| CK18     | Ab668   | Abcam                    | 1:200    |
| CK8      | Ab9023  | Abcam                    | 1:200    |
| HepPar1  | M7158   | DAKO                     | 1:500    |
| CYP1A2   | Ab22717 | Abcam                    | 1:100    |
| CYP3A4   | SC27639 | Santa cruz biotechnology | 1:100    |
